# Supplementary material for: The Forward and Lateral Tilt Angle of the Neck and Trunk Measured by Three-Dimensional Gait and Motion Analysis as a Candidate for a Severity Index in Patients with Parkinson’s Disease
Source: Neurol Int. 2022 Sep 13;14(3):727–37. doi: 10.3390/neurolint14030061 (PMC9504699; doi:10.3390/neurolint14030061)
Supplement: Supplementary file 1 [file neurolint-14-00061-s001.zip › neurolint-1859657-supplementary.pdf]

Table S1. MDS-UPDRS Score Sheet

| Part I  |                                    | Part III |                                                       |
|---------|------------------------------------|----------|-------------------------------------------------------|
| 1.1     | Cognitive impairment               | 3.1      | Speech                                                |
| 1.2     | Hallucinations and psychosis       | 3.2      | Facial expression                                     |
| 1.3     | Depressed mood                     | 3.3      | Rigidity<br>-Neck, RUE, LUE, RLE, LLE                 |
| 1.4     | Anxious mood                       |          |                                                       |
| 1.5     | Apathy                             | 3.4      | Finger tapping-Right, Left hand                       |
| 1.6     | Features of DDS                    | 3.5      | Hand movements-Right, Left hand                       |
| 1.7     | Sleep problems                     | 3.6      | Pronation-supination movements<br>- Right, Left hand  |
| 1.8     | Daytime sleepiness                 |          |                                                       |
| 1.9     | Pain and other sensations          | 3.7      | Toe tapping-Right, Left foot                          |
| 1.10    | Urinary problems                   | 3.8      | Leg agility-Right, Left leg                           |
| 1.11    | Constipation problems              | 3.9      | Arising from chair                                    |
| 1.12    | Light headedness on standing       | 3.10     | Gait                                                  |
| 1.13    | Fatigue                            | 3.11     | Freezing of gait                                      |
| Part II |                                    | 3.12     | Postural stability                                    |
| 2.1     | Speech                             | 3.13     | Posture                                               |
| 2.2     | Saliva and drooling                | 3.14     | Global spontaneity of movements                       |
| 2.3     | Chewing and swallowing             | 3.15     | Postural tremor-Right, Left hand                      |
| 2.4     | Eating tasks                       | 3.16     | Kinetic tremor-Right, Left hand                       |
| 2.5     | Dressing                           | 3.17     | Rest tremor amplitude<br>-RUE, LUE, RLE, LLE, Lip/jaw |
| 2.6     | Hygiene                            |          |                                                       |
| 2.7     | Handwriting                        | 3.18     | Constancy of rest                                     |
| 2.8     | Doing hobbies and other activities | Part IV  |                                                       |
| 2.9     | Turning in bed                     | 4.1      | Time spent with dyskinesias                           |
| 2.10    | Tremor                             | 4.2      | Functional impact of dyskinesias                      |
| 2.11    | Getting out of bed                 | 4.3      | Time spent in the OFF state                           |
| 2.12    | Walking and balance                | 4.4      | Functional impact of fluctuations                     |
| 2.13    | Freezing                           | 4.5      | Complexity of motor fluctuations                      |
|         |                                    | 4.6      | Painful OFF-state dystonia                            |

Legend : DDS = Dopamine Dysregulation Syndrome, RUE = right upper extremity, LUE = left upper extremity, RLE = right lower extremity, LLE = left lower extremity.
